# Supplementary material
Source: bioRxiv or medRxiv preprint supplement (https://www.biorxiv.org/content/biorxiv/early/2020/08/24/2020.08.24.262428/DC1/embed/media-1.pdf)

Extended Data Figure 1

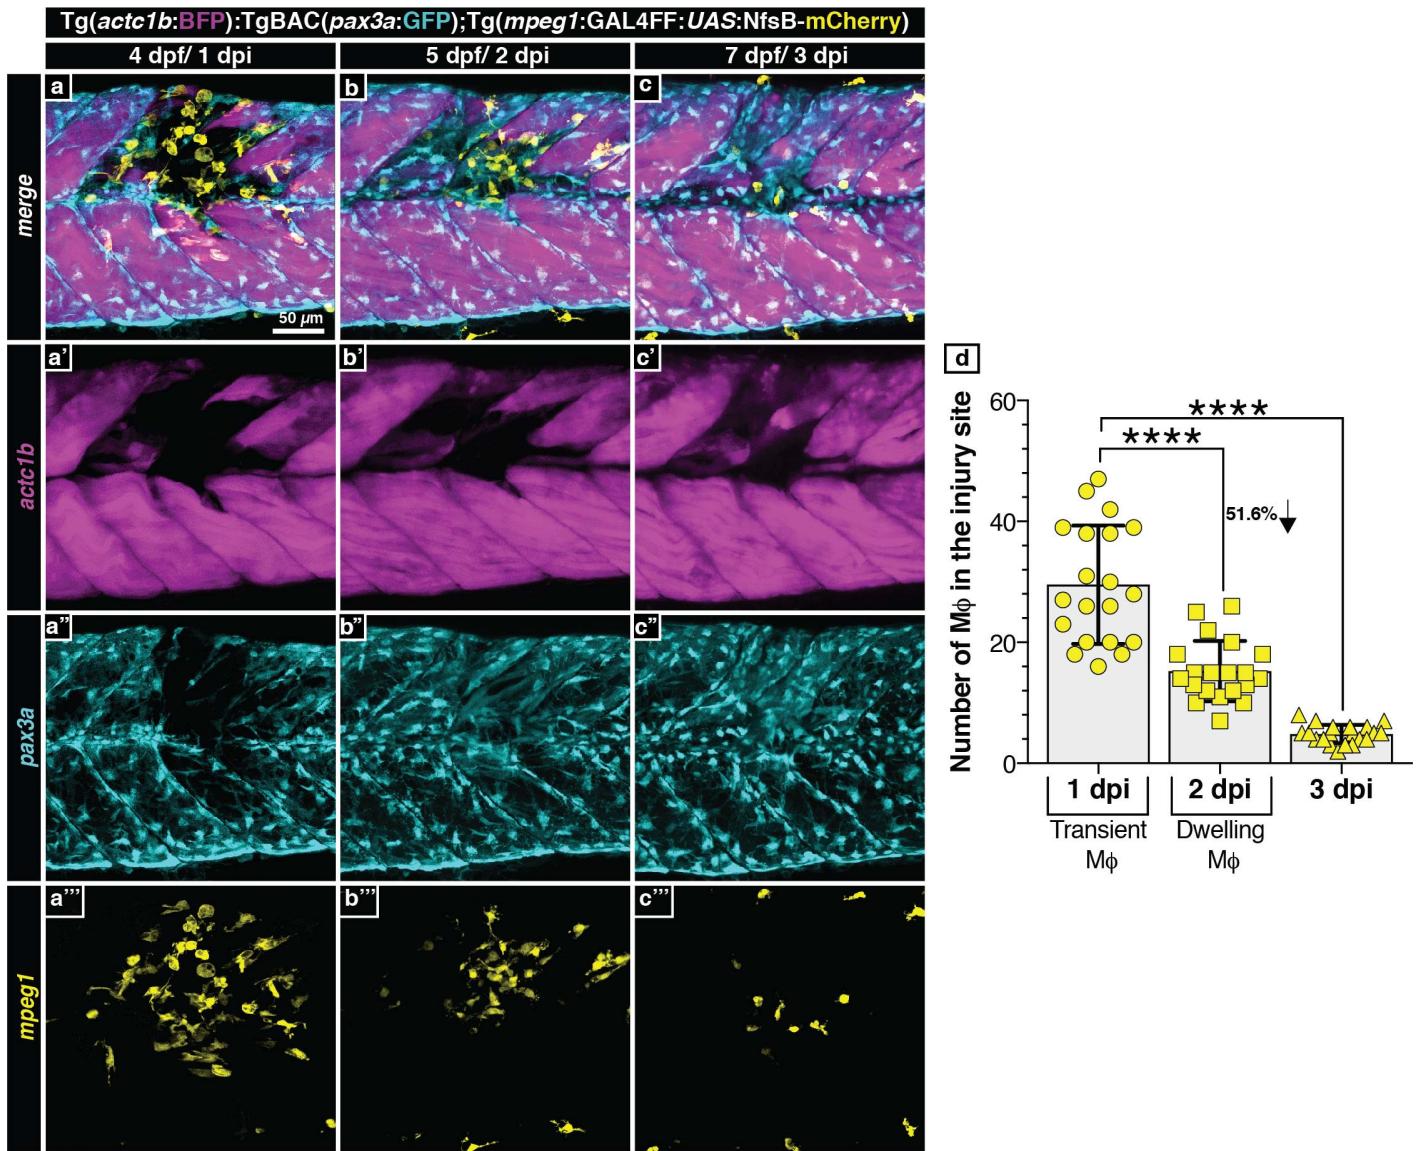

Extended Data Figure 2

Nitroreductase-mediated macrophage ablation

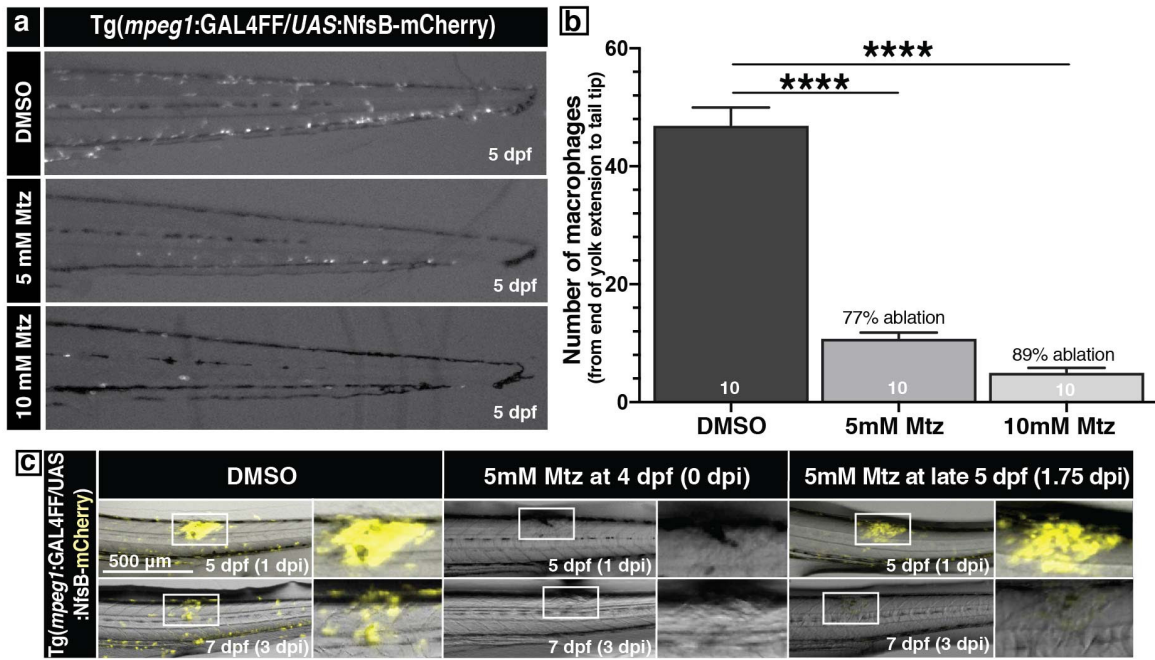

Nitroreductase-mediated neutrophil ablation

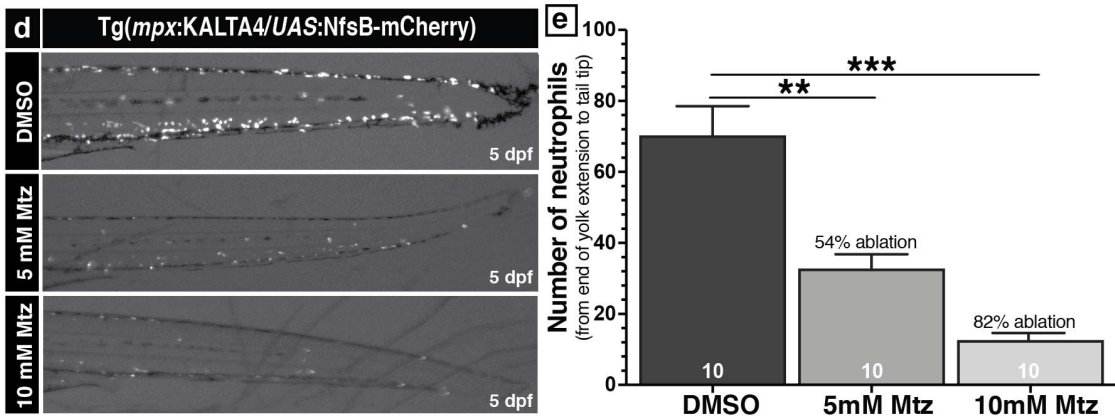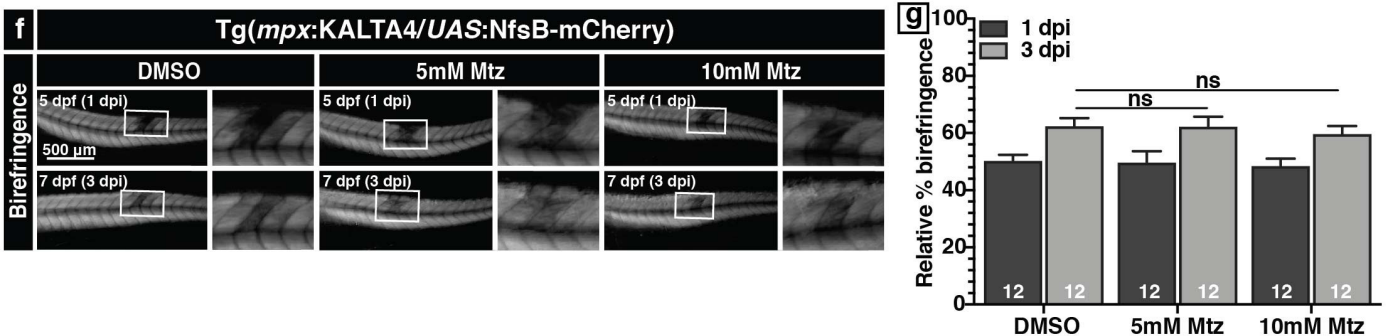

### Extended Data Figure 3

#### Phalloidin staining

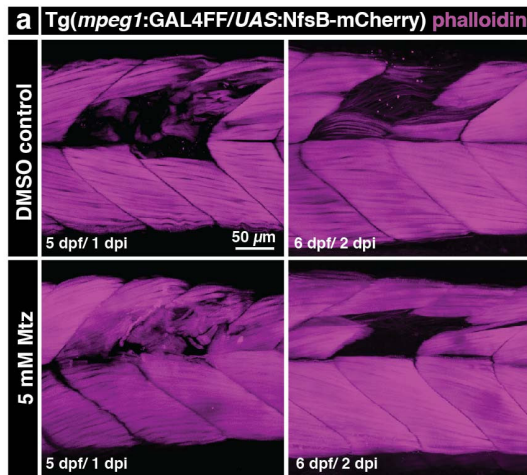

#### LysoTracker fluorescent vital dye

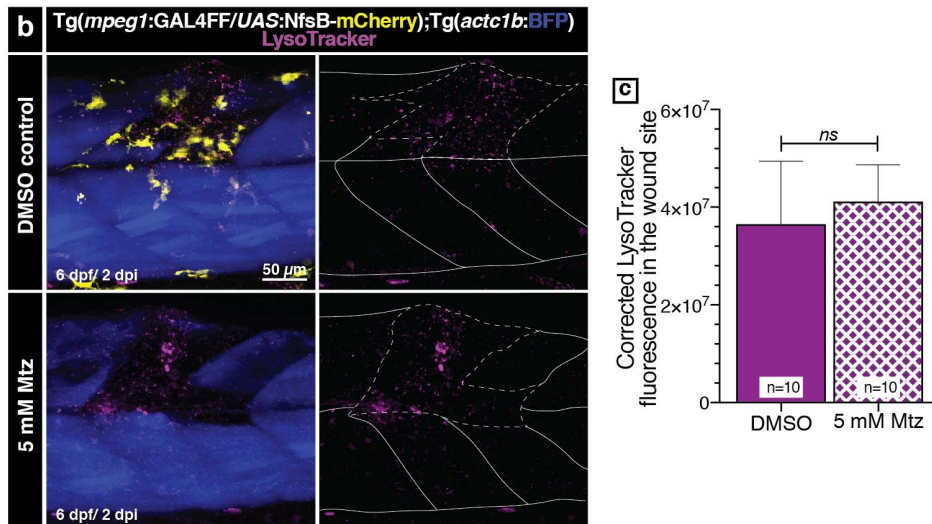

#### *Tg(ubi:secAnnexinV-mVenus)* imaging

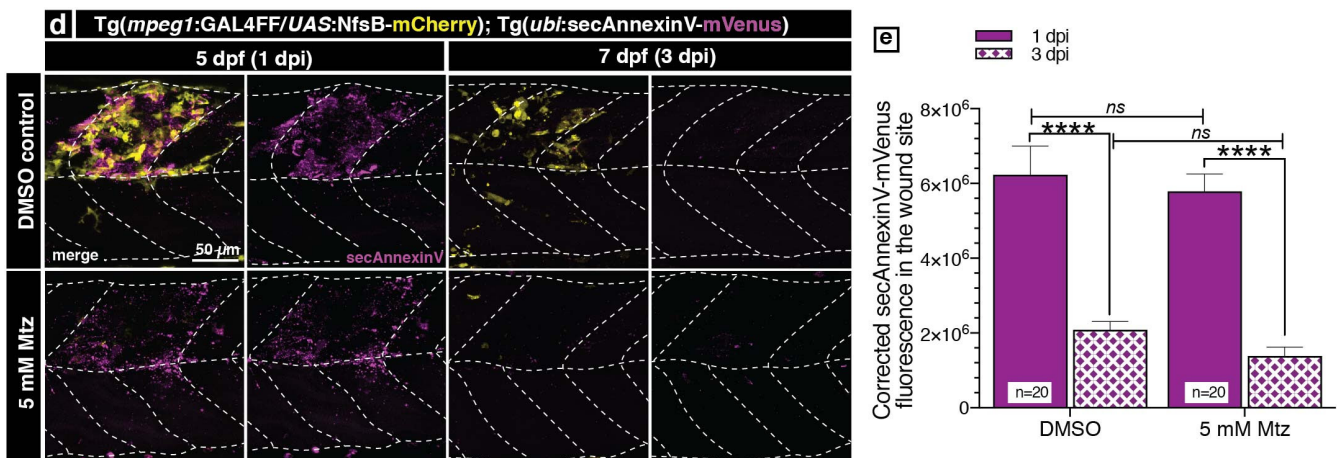



## Extended Data Figure 4

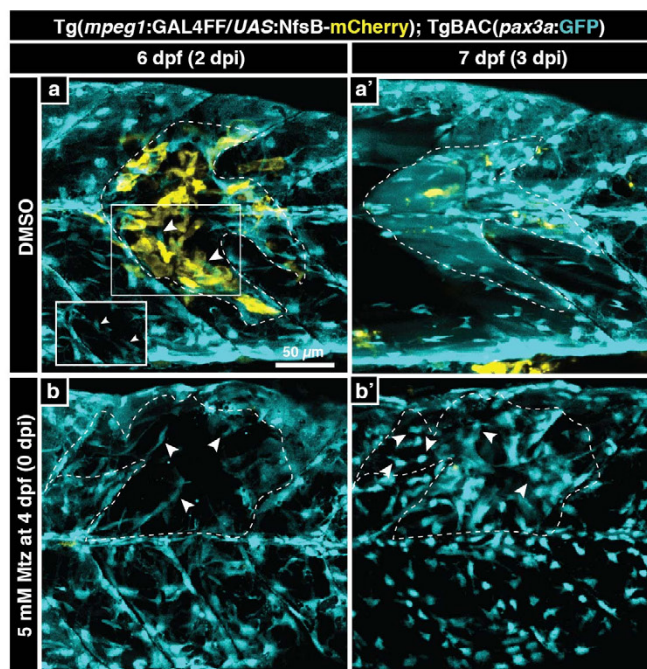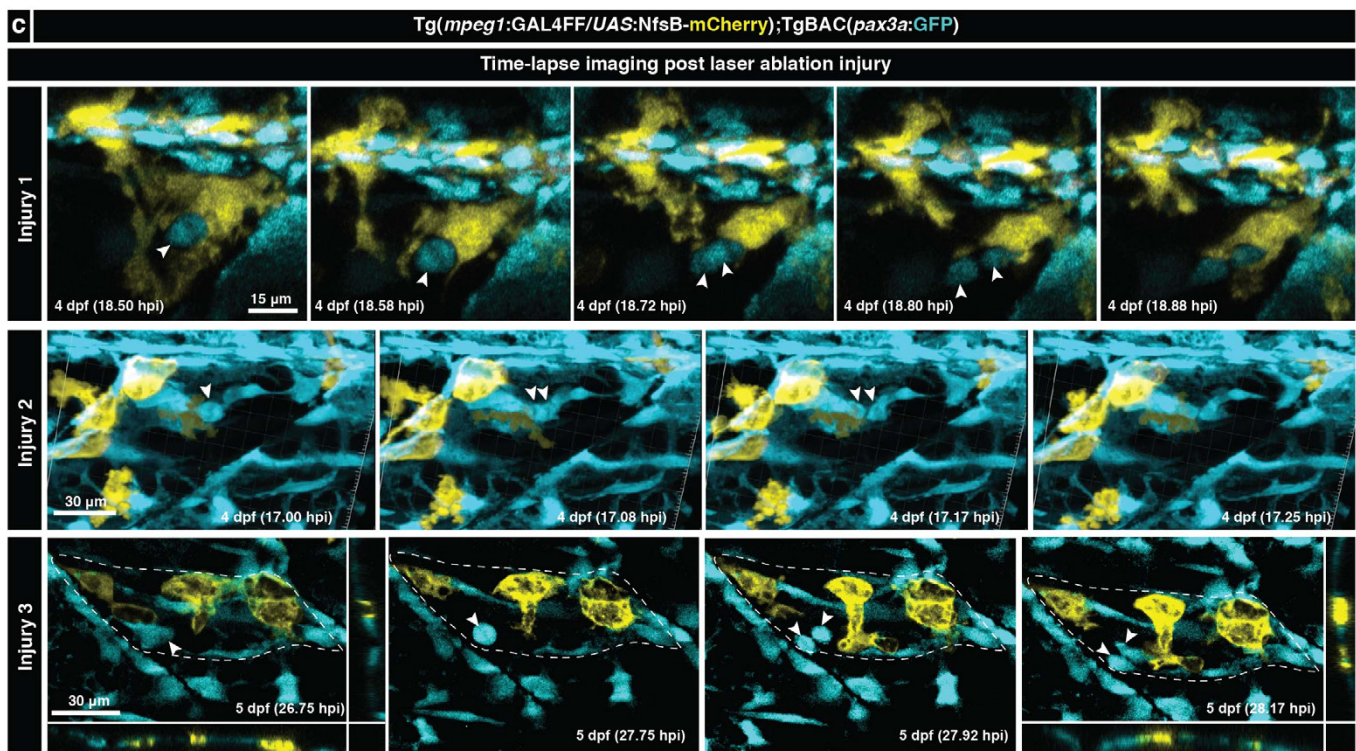

# Extended Data Figure 5

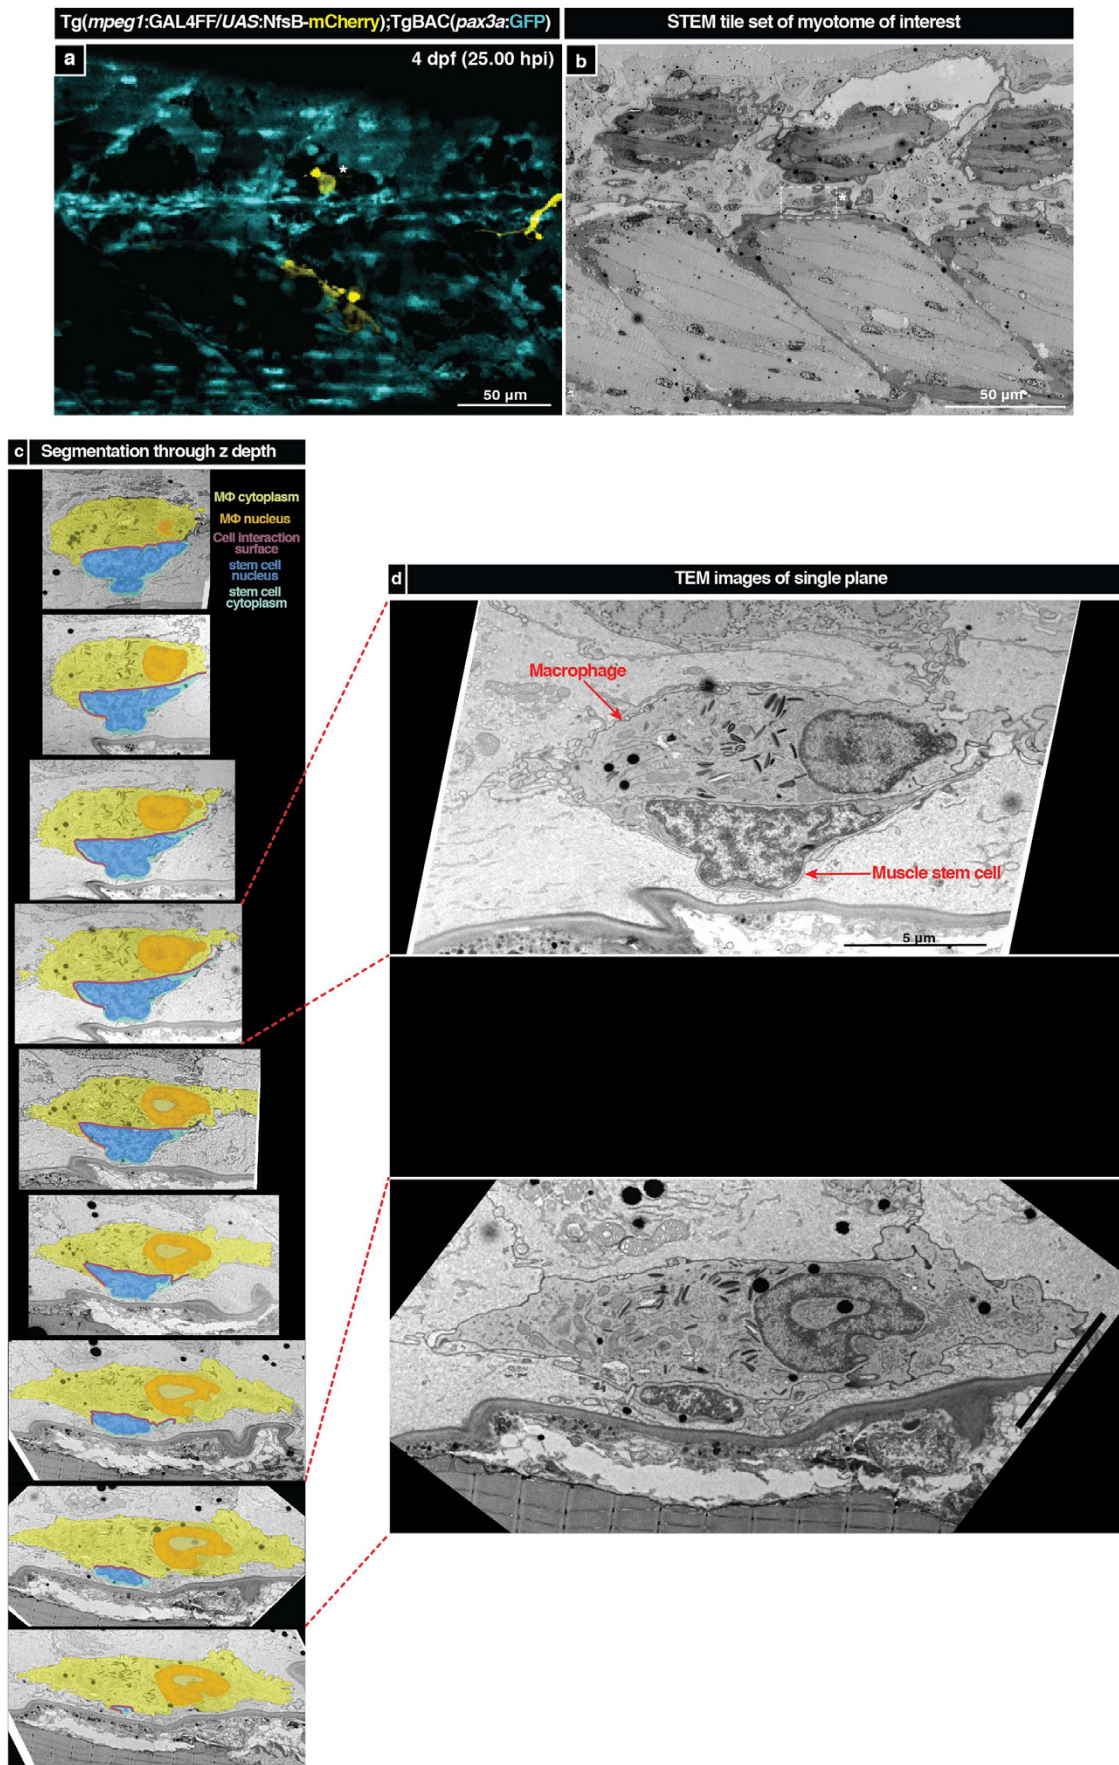



# Extended Data Figure 6

| #   | Average logFC | p value   | % cells in cluster 4 expressing gene | % cells outside cluster 4 expressing gene | Adjusted p value | Gene ID              | Gene symbol        |
|-----|---------------|-----------|--------------------------------------|-------------------------------------------|------------------|----------------------|--------------------|
| 1   | 3.51769726    | 2.46E-197 | 99.5%                                | 13.3%                                     | 3.74E-193        | ENSDARG00000010423   | npnl               |
| 2   | 3.43652721    | 9.50E-143 | 100.0%                               | 33.8%                                     | 1.44E-138        | ENSDARG00000042816   | mmp9               |
| 3   | 3.38223221    | 2.76E-185 | 98.6%                                | 14.8%                                     | 4.18E-181        | ENSDARG00000019521   | mpx                |
| 4   | 3.28014576    | 7.25E-150 | 98.6%                                | 25.7%                                     | 1.10E-145        | ENSDARG00000012395   | mmp13a             |
| 5   | 2.46606329    | 4.33E-208 | 91.1%                                | 6.0%                                      | 6.57E-204        | ENSDARG00000041524   | NA                 |
| 6   | 2.16041847    | 6.24E-104 | 84.3%                                | 8.0%                                      | 9.47E-100        | ENSDARG00000007769   | sult5a1            |
| 7   | 2.12152634    | 1.27E-168 | 82.2%                                | 7.0%                                      | 1.94E-164        | ENSDARG00000007682   | ppdpta             |
| 8   | 2.10412796    | 1.31E-107 | 95.3%                                | 45.0%                                     | 1.98E-103        | ENSDARG00000006029   | lta4h              |
| 9   | 2.07830633    | 4.19E-152 | 90.6%                                | 14.2%                                     | 6.36E-148        | ENSDARG000000090730  | cbf1               |
| 10  | 1.87552844    | 3.06E-135 | 79.8%                                | 10.8%                                     | 4.65E-131        | ENSDARG000000070398  | NA                 |
| 11  | 1.87151026    | 1.25E-87  | 76.5%                                | 19.9%                                     | 1.91E-83         | ENSDARG000000089706  | si:ch211-276a23.5  |
| 12  | 1.80992908    | 1.77E-148 | 76.5%                                | 6.7%                                      | 2.68E-144        | ENSDARG000000093124  | scnp8              |
| 13  | 1.7631958     | 1.24E-108 | 93.4%                                | 30.9%                                     | 1.89E-104        | ENSDARG000000058348  | limd2              |
| 14  | 1.68944       | 3.32E-78  | 57.3%                                | 9.1%                                      | 5.05E-74         | ENSDARG00000003227   | NA                 |
| 15  | 1.64420477    | 9.46E-67  | 68.1%                                | 19.4%                                     | 1.44E-62         | ENSDARG000000033227  | lect2l             |
| 16  | 1.63449553    | 1.20E-66  | 94.4%                                | 63.3%                                     | 1.82E-62         | ENSDARG00000013598   | tnfb               |
| 17  | 1.52901339    | 3.47E-94  | 96.2%                                | 56.7%                                     | 5.28E-90         | ENSDARG000000035136  | selenow1           |
| 18  | 1.5127773     | 1.94E-97  | 83.1%                                | 21.4%                                     | 2.95E-93         | ENSDARG000000078092  | limd2              |
| 19  | 1.51231421    | 2.59E-77  | 64.8%                                | 14.1%                                     | 3.94E-73         | ENSDARG000000057430  | NA                 |
| 20  | 1.51190873    | 2.38E-123 | 66.2%                                | 5.9%                                      | 3.62E-119        | ENSDARG000000056499  | ca6                |
| 21  | 1.50351826    | 1.06E-137 | 61.0%                                | 2.8%                                      | 1.60E-133        | ENSDARG000000015657  | zgc:77112          |
| 22  | 1.49086817    | 7.47E-158 | 87.6%                                | 3.0%                                      | 1.13E-151        | ENSDARG000000036382  | ponzr8             |
| 23  | 1.48791858    | 4.28E-93  | 97.2%                                | 60.3%                                     | 6.40E-89         | ENSDARG000000077069  | srng               |
| 24  | 1.4694092     | 2.03E-114 | 100.0%                               | 99.4%                                     | 3.08E-110        | ENSDARG000000095556  | LOC795545          |
| 25  | 1.45073072    | 1.23E-102 | 66.7%                                | 8.7%                                      | 1.87E-98         | ENSDARG000000034187  | calm1b             |
| 26  | 1.44366232    | 4.24E-67  | 53.5%                                | 9.3%                                      | 6.44E-63         | ENSDARG000000039269  | arg2               |
| 27  | 1.4136587     | 1.17E-59  | 91.1%                                | 61.6%                                     | 1.78E-55         | ENSDARG000000068784  | vsir               |
| 28  | 1.37002123    | 1.71E-67  | 85.9%                                | 39.4%                                     | 1.09E-62         | ENSDARG000000086337  | sidkey-102g19.3    |
| 29  | 1.36152834    | 1.89E-57  | 60.1%                                | 15.2%                                     | 2.87E-53         | ENSDARG000000078525  | noctb              |
| 30  | 1.35387318    | 1.44E-69  | 88.3%                                | 42.5%                                     | 2.18E-65         | ENSDARG000000073777  | odc1               |
| 31  | 1.34789643    | 5.30E-62  | 74.2%                                | 27.5%                                     | 8.05E-58         | ENSDARG00000002021   | pygb               |
| 32  | 1.33152195    | 4.44E-91  | 70.0%                                | 12.9%                                     | 6.74E-87         | ENSDARG000000038458  | NA                 |
| 33  | 1.32613329    | 2.05E-120 | 52.6%                                | 2.1%                                      | 3.12E-116        | ENSDARG000000086869  | NA                 |
| 34  | 1.30030857    | 4.48E-58  | 72.3%                                | 24.6%                                     | 6.77E-54         | ENSDARG000000053836  | si:ch211-284a019.8 |
| 35  | 1.29743632    | 2.73E-71  | 89.2%                                | 45.1%                                     | 4.15E-67         | ENSDARG000000063295  | myh9a              |
| 36  | 1.26808592    | 1.71E-113 | 74.2%                                | 8.7%                                      | 2.59E-109        | ENSDARG000000093193  | chia.6             |
| 37  | 1.25126448    | 6.86E-81  | 69.5%                                | 13.5%                                     | 1.04E-76         | ENSDARG000000043457  | gapdh              |
| 38  | 1.24510972    | 5.36E-77  | 64.8%                                | 13.2%                                     | 8.14E-73         | ENSDARG000000052656  | si:ch211-193e13.5  |
| 39  | 1.23994196    | 8.84E-58  | 81.7%                                | 39.4%                                     | 1.31E-53         | ENSDARG000000019236  | gsr                |
| 40  | 1.22881477    | 1.20E-63  | 62.0%                                | 15.4%                                     | 1.83E-59         | ENSDARG000000053381  | plpp1a             |
| 41  | 1.22046143    | 2.53E-65  | 78.9%                                | 30.5%                                     | 3.85E-61         | ENSDARG000000006019  | tktb               |
| 42  | 1.22015324    | 9.85E-60  | 85.4%                                | 38.3%                                     | 1.50E-55         | ENSDARG000000078547  | si:ch211-264f5.2   |
| 43  | 1.21978331    | 3.11E-80  | 100.0%                               | 71.9%                                     | 4.72E-76         | ENSDARG000000031153  | NA                 |
| 44  | 1.21851595    | 5.37E-87  | 48.8%                                | 4.2%                                      | 8.16E-83         | ENSDARG000000015922  | stk17al            |
| 45  | 1.2094942     | 1.66E-99  | 59.6%                                | 6.3%                                      | 2.52E-95         | ENSDARG000000009782  | myh11a             |
| 46  | 1.19878784    | 2.62E-31  | 75.6%                                | 45.8%                                     | 3.97E-27         | ENSDARG000000055186  | cor9a              |
| 47  | 1.19556383    | 1.95E-56  | 94.4%                                | 71.8%                                     | 2.97E-52         | ENSDARG00000007693   | nfkbiab            |
| 48  | 1.19263256    | 3.81E-64  | 49.3%                                | 7.9%                                      | 5.78E-60         | ENSDARG000000013561  | pgm1               |
| 49  | 1.16112986    | 6.96E-69  | 93.0%                                | 56.2%                                     | 1.06E-64         | ENSDARG000000052978  | mbnl1              |
| 50  | 1.16011422    | 1.77E-34  | 62.9%                                | 27.0%                                     | 2.69E-30         | ENSDARG000000005673  | fb3                |
| 51  | 1.1314922     | 3.23E-53  | 85.4%                                | 49.3%                                     | 4.90E-49         | ENSDARG000000014348  | stk17b             |
| 52  | 1.12777964    | 7.32E-90  | 56.8%                                | 6.9%                                      | 1.11E-85         | ENSDARG000000075870  | trioba1            |
| 53  | 1.08027721    | 1.22E-59  | 57.7%                                | 12.8%                                     | 1.86E-55         | ENSDARG000000032932  | cnkr1              |
| 54  | 1.07947549    | 6.74E-14  | 53.1%                                | 30.7%                                     | 1.02E-09         | ENSDARG000000070622  | NA                 |
| 55  | 1.07860968    | 6.32E-37  | 48.8%                                | 13.9%                                     | 9.60E-33         | ENSDARG000000018145  | mid1ip11           |
| 56  | 1.06525495    | 3.10E-70  | 61.5%                                | 12.0%                                     | 4.71E-66         | ENSDARG000000059110  | NA                 |
| 57  | 1.05656185    | 3.64E-84  | 39.0%                                | 1.9%                                      | 5.53E-80         | ENSDARG000000052766  | NA                 |
| 58  | 1.05024664    | 2.75E-45  | 77.5%                                | 42.4%                                     | 4.18E-41         | ENSDARG000000026350  | wasb               |
| 59  | 1.04344952    | 8.42E-38  | 78.9%                                | 45.7%                                     | 1.28E-33         | ENSDARG000000035326  | ncorp1             |
| 60  | 1.02083795    | 3.73E-47  | 83.6%                                | 49.2%                                     | 5.67E-43         | ENSDARG000000012987  | gpia               |
| 61  | 1.01191026    | 6.86E-40  | 54.9%                                | 18.1%                                     | 1.04E-35         | ENSDARG000000013705  | ccm2               |
| 62  | 1.00605145    | 8.59E-44  | 87.8%                                | 63.9%                                     | 1.30E-39         | ENSDARG000000036967  | smox               |
| 63  | 1.00599877    | 4.72E-50  | 59.6%                                | 16.4%                                     | 7.17E-46         | ENSDARG000000037801  | si:dkkey-85p17.3   |
| 64  | 0.99619739    | 4.52E-40  | 59.6%                                | 22.4%                                     | 6.86E-36         | ENSDARG000000071065  | g6pd               |
| 65  | 0.99346688    | 1.82E-30  | 83.6%                                | 56.3%                                     | 2.76E-26         | ENSDARG000000078619  | pnp5a              |
| 66  | 0.99273801    | 3.21E-43  | 82.6%                                | 53.1%                                     | 4.88E-39         | ENSDARG000000012256  | NA                 |
| 67  | 0.97506782    | 5.09E-33  | 79.8%                                | 53.2%                                     | 7.73E-29         | ENSDARG000000044619  | birc2              |
| 68  | 0.97451848    | 8.73E-95  | 100.0%                               | 100.0%                                    | 1.07E-91         | ENSDARG000000037870  | actb2              |
| 69  | 0.97310907    | 9.40E-39  | 51.6%                                | 15.1%                                     | 1.43E-34         | ENSDARG000000001452  | adama8a            |
| 70  | 0.97102903    | 3.35E-48  | 90.1%                                | 59.4%                                     | 5.08E-44         | ENSDARG000000002721  | denn4a             |
| 71  | 0.96769076    | 4.35E-32  | 66.2%                                | 32.4%                                     | 6.61E-28         | ENSDARG000000030598  | nampt1a            |
| 72  | 0.96659516    | 1.88E-80  | 41.8%                                | 2.8%                                      | 2.85E-76         | ENSDARG0000000055705 | if5                |
| 73  | 0.96522809    | 5.73E-92  | 50.2%                                | 4.0%                                      | 8.69E-88         | ENSDARG00000000149   | ablim1a            |
| 74  | 0.96018943    | 1.02E-84  | 39.4%                                | 1.8%                                      | 1.55E-80         | ENSDARG000000077975  | si:ch73-343f4.8    |
| 75  | 0.95761111    | 1.31E-23  | 62.4%                                | 34.7%                                     | 1.99E-19         | ENSDARG000000042382  | NA                 |
| 76  | 0.95416288    | 9.96E-37  | 78.1%                                | 41.5%                                     | 1.52E-32         | ENSDARG000000036637  | arl11              |
| 77  | 0.95084342    | 3.31E-38  | 47.4%                                | 14.0%                                     | 5.03E-32         | ENSDARG000000079353  | nmrk1              |
| 78  | 0.94000322    | 5.85E-34  | 81.2%                                | 62.8%                                     | 8.88E-30         | ENSDARG000000068214  | ccni               |
| 79  | 0.93656916    | 1.41E-42  | 77.5%                                | 36.2%                                     | 2.14E-38         | ENSDARG00000004979   | elov5f             |
| 80  | 0.93194757    | 1.38E-28  | 87.8%                                | 64.3%                                     | 2.09E-24         | ENSDARG000000033735  | ncf1               |
| 81  | 0.92953484    | 1.09E-41  | 55.9%                                | 17.8%                                     | 1.66E-37         | ENSDARG000000057053  | zgc:91976          |
| 82  | 0.92892269    | 8.26E-57  | 46.0%                                | 7.4%                                      | 1.25E-52         | ENSDARG000000010556  | mmp25b             |
| 83  | 0.92427477    | 8.88E-71  | 58.7%                                | 10.9%                                     | 1.35E-66         | ENSDARG000000004647  | splice1            |
| 84  | 0.92319626    | 3.75E-40  | 54.5%                                | 17.1%                                     | 5.70E-36         | ENSDARG000000063195  | pxk                |
| 85  | 0.91734144    | 6.07E-37  | 65.7%                                | 26.6%                                     | 9.22E-33         | ENSDARG000000039884  | NA                 |
| 86  | 0.91012995    | 1.49E-29  | 33.8%                                | 7.9%                                      | 2.26E-25         | ENSDARG000000012671  | inhbaa             |
| 87  | 0.9082643     | 2.54E-102 | 43.7%                                | 1.5%                                      | 3.85E-98         | ENSDARG000000069440  | dachd              |
| 88  | 0.9067071     | 5.33E-64  | 37.1%                                | 3.1%                                      | 8.09E-60         | ENSDARG000000009208  | prkcd              |
| 89  | 0.90038508    | 1.59E-25  | 66.7%                                | 36.9%                                     | 2.41E-21         | ENSDARG000000019702  | aldocb             |
| 90  | 0.89617091    | 2.31E-103 | 43.2%                                | 1.4%                                      | 3.51E-99         | ENSDARG000000093248  | NA                 |
| 91  | 0.89200683    | 6.01E-32  | 77.9%                                | 48.4%                                     | 9.12E-28         | ENSDARG000000054272  | caprin1b           |
| 92  | 0.8789271     | 1.17E-55  | 42.3%                                | 6.3%                                      | 1.78E-51         | ENSDARG000000043182  | hhia2a.1           |
| 93  | 0.87828949    | 9.16E-54  | 95.8%                                | 83.4%                                     | 1.39E-49         | ENSDARG000000027063  | arpc1b             |
| 94  | 0.87679857    | 3.35E-30  | 68.1%                                | 35.8%                                     | 5.08E-26         | ENSDARG000000010752  | acs14b             |
| 95  | 0.87632591    | 5.80E-34  | 68.1%                                | 30.9%                                     | 8.80E-30         | ENSDARG000000071384  | slc7a11            |
| 96  | 0.86981487    | 5.22E-40  | 68.5%                                | 30.1%                                     | 7.93E-36         | ENSDARG000000004378  | yrk                |
| 97  | 0.86948795    | 6.80E-63  | 100.0%                               | 95.1%                                     | 1.03E-58         | ENSDARG000000088091  | pfn1               |
| 98  | 0.86896945    | 1.20E-37  | 32.4%                                | 5.5%                                      | 1.82E-33         | ENSDARG000000053931  | si:dkkey-42f23.5   |
| 99  | 0.86896495    | 3.74E-48  | 90.1%                                | 60.8%                                     | 5.68E-44         | ENSDARG000000041505  | itm2b              |
| 100 | 0.86866486    | 1.59E-16  | 66.2%                                | 44.8%                                     | 2.41E-12         | ENSDARG000000056875  | NA                 |

Extended Data Figure 7

NAMPT binding to CCR5

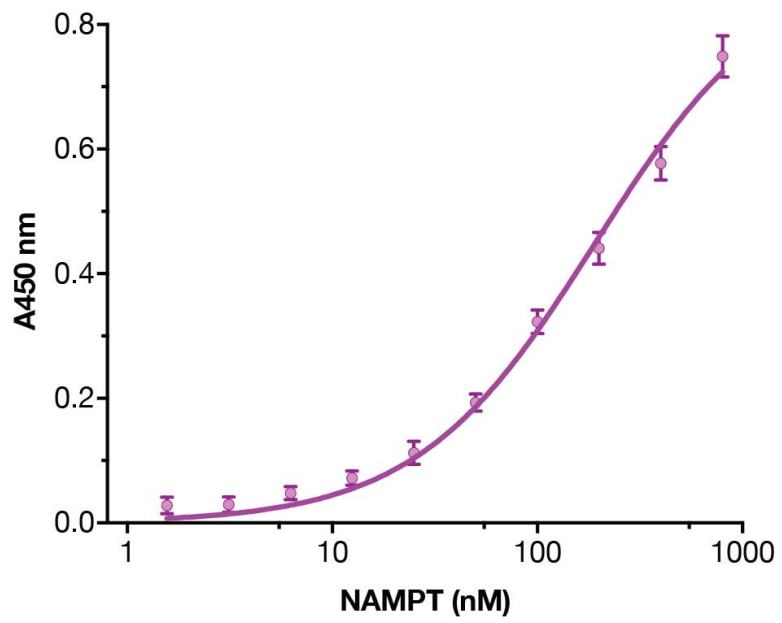

**Extended Data Figure 8**

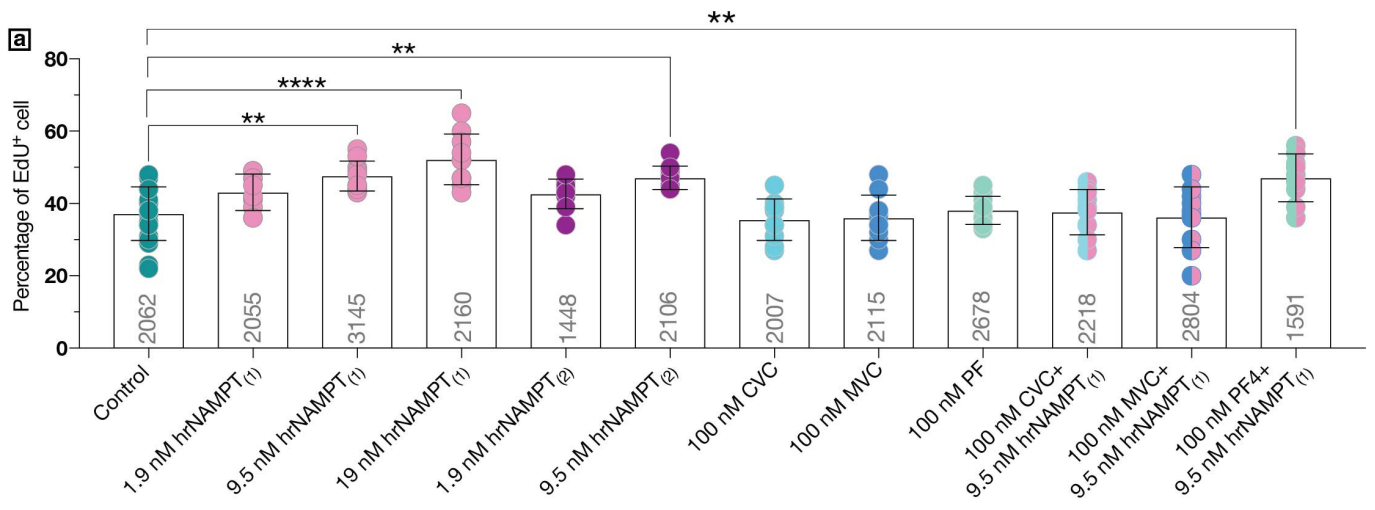



# Extended Data Figure 9

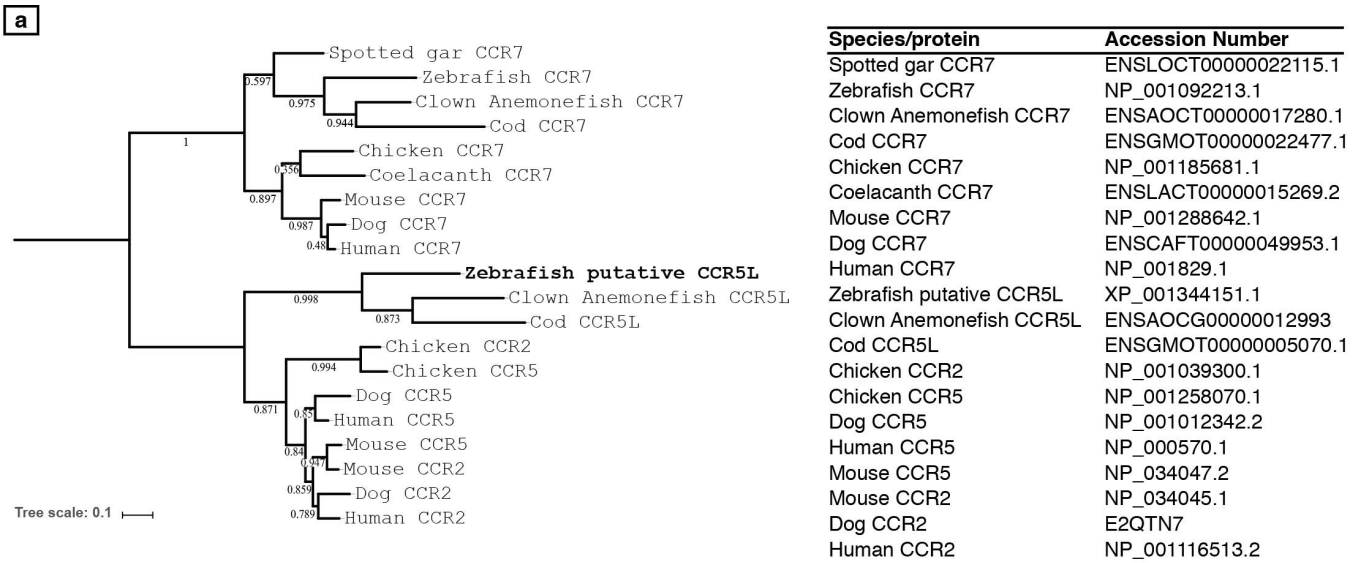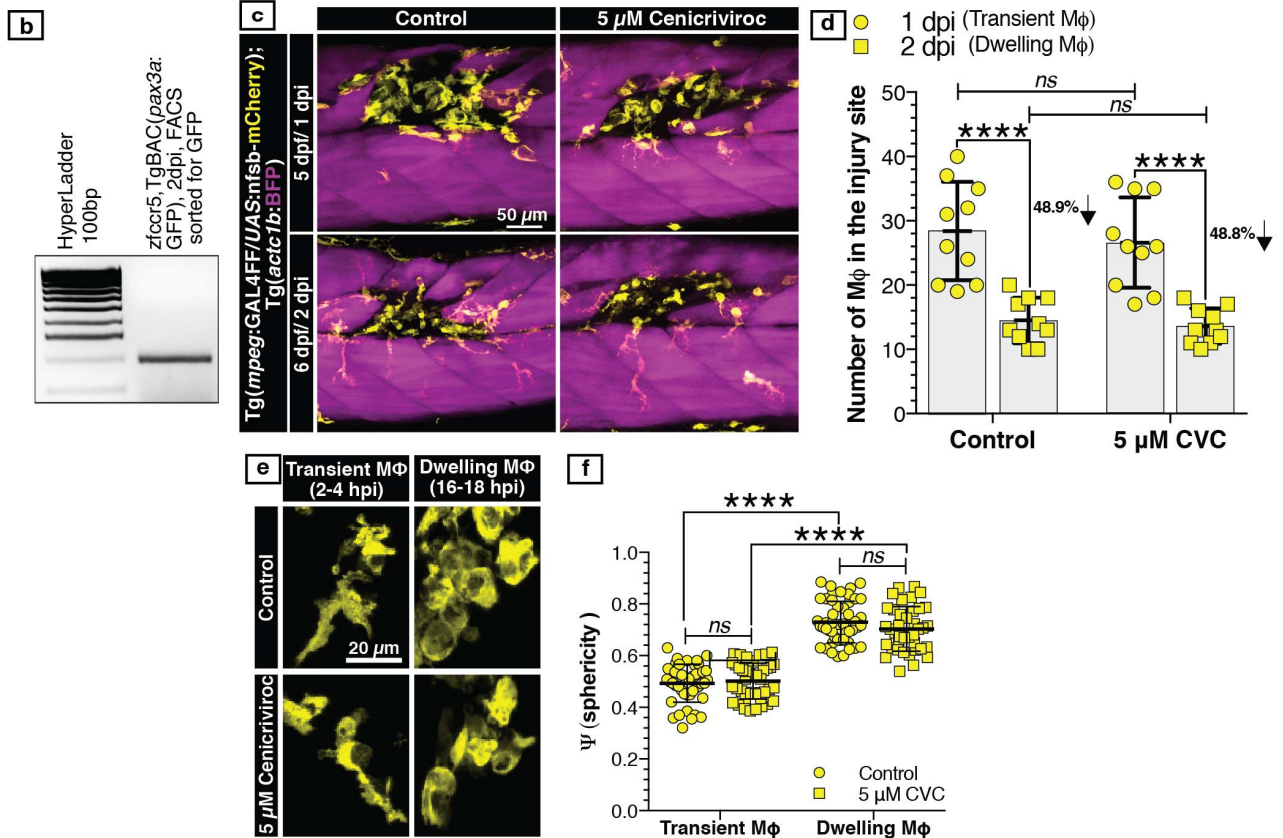

## Extended Data Figure 10

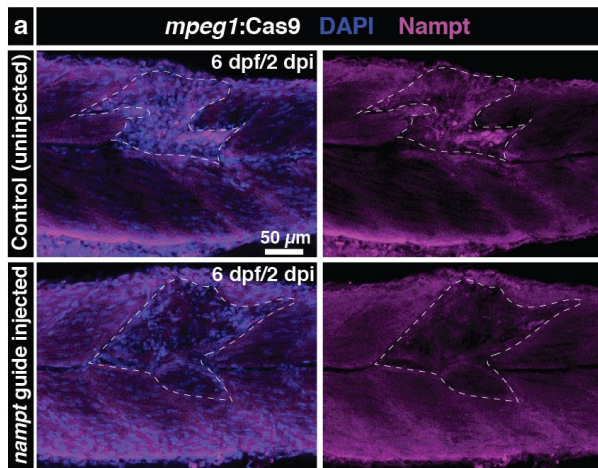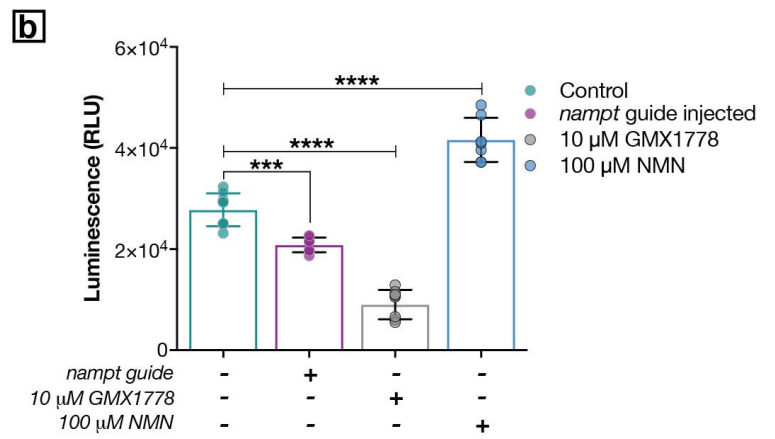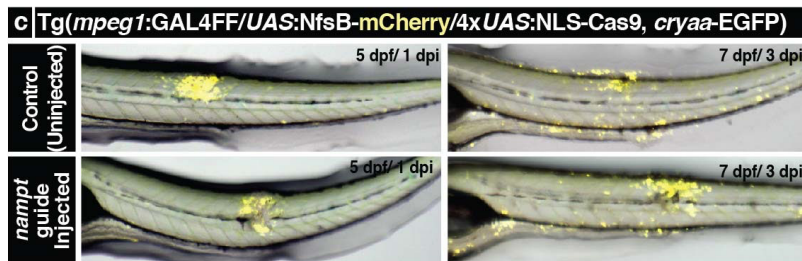

Supplement: Supplementary file [file media-1.pdf]
